# Supplementary material for: Kinase Inhibitor Treatment of Patients with Advanced Cancer Results in High Tumor Drug Concentrations and in Specific Alterations of the Tumor Phosphoproteome
Source: MDPI journal article supplement (doi:10.3390/cancers12020330), 2020-02-01
Supplement: s1 [file s1]

# **Kinase Inhibitor Treatment of Patients with Advanced Cancer Results in High Tumor Drug Concentrations and in Specific Alterations of the Tumor Phosphoproteome**

Mariette Labots, Thang V. Pham, Richard J. Honeywell, Jaco C. Knol, Robin Beekhof, Richard de Goeij-de Haas, Henk Dekker, Maarten Neerincx, Sander R. Piersma, Johannes C. van der Mijn, Donald L. van der Peet, Martijn R. Meijerink, Godefridus J. Peters, Nicole C.T. van Grieken, Connie R. Jiménez and Henk M.W. Verheul

Table S1. PKI concentration in tissue and blood from individual patients

Table S2. Metrics of obtained protein and identified phosphopeptides and -sites per patient

Table S3. All identified and quantified phosphopeptides \*

Table S4. All identified phosphosites and sample labeling \*

Table S5. List of highly regulated phosphopeptides in at least 3 patients per cohort \*

Table S6. PKI target profiles

Figure S1. Patient disposition flowchart

Figure S2. Pearson's correlations of HCT 116 control samples

Figure S3. Protein interaction networks of PKI-regulated phosphopeptides

Figure S4. Protein interaction networks of PKI-regulated phosphopeptides related to tumor concentration

Figure S5. Example of substrate inhibition in relation to sorafenib response

\* Due to file size, Table S3, S4 and S5 (.xls) could not be included in this .docx file but have been uploaded separately.

**Table S1.** PKI concentrations in tissue and blood from individual patients.

| Patient ID   | Tumor type         | Tumor  | Skin   | Plasma | Serum   |
|--------------|--------------------|--------|--------|--------|---------|
| SOR 1        | Hepatocellular     | 6.9    | 4.4    | 8.5    | 11.6    |
| SOR 2        | Melanoma           | 22.0   | 7.2    | 4.2    | 6.9     |
| SOR 3        | Hepatocellular     | 10.0   | 6.3    | 4.8    | 6.1     |
| SOR 4        | Hepatocellular     | 3.7    | 1.4    | 3.7    | 4.8     |
| SOR 5        | Thyroid, papillary | 22.9   | 28.4   | 12.1   | 17.4    |
| ERL 1        | Pancreatic         | 10.8   | 2.1    | 1.9    | 2.1     |
| ERL 2        | HNSCC              | 0.9    | 2.3    | 1.2    | 1.0     |
| ERL 3        | Pancreatic         | 8.8    | 6.7    | 4.0    | 4.4     |
| ERL 4        | Rectal             | 1.7    | 2.8    | 0.9    | 0.9     |
| ERL 5        | Esophageal         | 4.2    | 3.3    | 1.1    | 1.1     |
| DAS 1        | Esophageal         | 18.9   | 0.4    | 0.016  | 0.017   |
| DAS 2        | Colorectal         | 2.0    | NA     | 0.041  | 0.037   |
| DAS 3        | Prostate           | 64.0   | 18.5   | 0.005  | No peak |
| DAS 4        | Colorectal         | 0.2    | 0.3    | 0.012  | No peak |
| DAS 5        | Melanoma           | 0.5    | 0.2    | 0.007  | 0.009   |
| VEM 1        | Melanoma           | 2347.3 | 391.9  | 98.2   | 46.7    |
| VEM 2        | Melanoma           | 1192.0 | 2449.4 | 94.6   | 119.7   |
| VEM 3        | Melanoma           | 330.7  | 749.1  | 108.0  | 131.0   |
| VEM 4        | Melanoma           | 1459.4 | 2016.6 | 209.7  | 190.0   |
| VEM 5        | Melanoma           | 1016.5 | 957.3  | 192.7  | 241.9   |
| VEM 6        | Melanoma           | 1630.9 | 2557.1 | 65.0   | 75.3    |
| VEM <i>a</i> | Melanoma           | NA     | 800.1  | 81.4   | 97.1    |
| VEM <i>b</i> | Melanoma           | NA     | 119.6  | NA     | 48.6    |
| SUN 1        | Clear cell sarcoma | 2.4    | NA     | 0.14   | 0.14    |
| SUN 2        | ACUP               | 2.3    | 9.7    | 0.16   | 0.16    |
| SUN 3        | Colorectal         | 13.7   | NA     | 0.11   | 0.12    |
| SUN 4        | Colorectal         | 9.0    | 0.5    | 0.08   | 0.09    |
| SUN 5        | Renal cell         | 50.0   | 4.3    | 0.11   | 0.12    |
| EVE 1        | Renal cell         | 3.6    | NE     | NE     | NE      |
| EVE 2        | Renal cell         | 3.4    | NE     | NE     | NE      |
| EVE 3        | Renal cell         | NE     | NE     | NE     | NE      |
| EVE 4        | Pancreatic NET     | NE     | NE     | NE     | NE      |
| EVE 5        | NET                | NE     | NE     | NE     | NE      |

Concentrations in  $\mu\text{M}$  after 10–14 days in patients for whom on-treatment biopsies were available for evaluation of tumor concentration and/or phosphoproteomics. *VEM a,b*; Additional skin biopsies were obtained from 2 patients in whom no on-treatment tumor tissue was available after treatment. In VEM a, tumor re-biopsy was not possible due to response of the lesion. On-treatment tumor biopsy was not deemed safe for VEM b. NA; not available. NE; not evaluable. .

**Table S2.** Metrics of obtained protein and identified phosphopeptides and -sites per patient.

| Patient ID   | Needle size (G) | Protein yield / biopsy (µg) |       | Protein input (mg) | # Phospho-peptides |       | # Phosphosites |       | Phosphosite enrichment |     |               |     |             |      |
|--------------|-----------------|-----------------------------|-------|--------------------|--------------------|-------|----------------|-------|------------------------|-----|---------------|-----|-------------|------|
|              |                 | Pre-tx                      | On-tx |                    | Pre-tx             | On-tx | Pre-tx         | On-tx | %S (pre - on)          |     | %T (pre - on) |     | %Y (pre-on) |      |
| <b>SOR 1</b> | 14 - 14         | 2990                        | 3050  | 2.9                | 506                | 469   | 414            | 373   | 2,9                    | 3,0 | 2,4           | 2,1 | 94,7        | 94,9 |
| <b>SOR 2</b> | 14 - 14         | 2240                        | 7660  | 2.0                | 386                | 384   | 304            | 297   | 1,3                    | 1,7 | 3,3           | 2,4 | 95,4        | 96,0 |
| <b>SOR 3</b> | 14 - 14         | 2760                        | 1490  | 1.5                | 412                | 421   | 308            | 329   | 2,0                    | 1,5 | 2,9           | 3,3 | 95,1        | 95,1 |
| <b>SOR 4</b> | 14 - 14         | 3080                        | 2270  | 2.0                | 461                | 436   | 361            | 343   | 2,5                    | 2,9 | 3,1           | 3,2 | 94,5        | 93,9 |
| <b>SOR 5</b> | 16 - 14         | 930                         | 1560  | 1.0                | 342                | 371   | 262            | 286   | 2,3                    | 2,8 | 3,4           | 3,2 | 94,3        | 94,1 |
|              |                 |                             |       |                    |                    |       |                |       |                        |     |               |     |             |      |
| <b>ERL 1</b> | 14 - 14         | 1280                        | 950   | 1.0                | 404                | 439   | 330            | 348   | 7,6                    | 7,8 | 3,9           | 4,3 | 88,5        | 87,9 |
| <b>ERL 2</b> | 14 - 14         | 2780                        | 2770  | 2.5                | 639                | 621   | 505            | 495   | 2,6                    | 3,2 | 4,0           | 4,0 | 93,5        | 92,7 |
| <b>ERL 3</b> | 14 - 16         | 2990                        | 2390  | 2.2                | 653                | 434   | 530            | 372   | 5,3                    | 4,3 | 3,8           | 4,3 | 90,9        | 91,4 |
| <b>ERL 4</b> | 14 - 14         | 3290                        | 2330  | 2.2                | 435                | 701   | 346            | 584   | 2,3                    | 4,3 | 2,9           | 3,6 | 94,8        | 92,1 |
| <b>ERL 5</b> | 18 - 16         | 1160                        | 1240  | 1.1                | 545                | 465   | 440            | 369   | 3,0                    | 2,4 | 4,6           | 2,4 | 92,5        | 95,1 |
|              |                 |                             |       |                    |                    |       |                |       |                        |     |               |     |             |      |
| <b>DAS 1</b> | GI - GI         | 1560                        | 1530  | 1.5                | 687                | 598   | 556            | 477   | 3,6                    | 2,7 | 3,4           | 3,6 | 93,0        | 93,7 |
| <b>DAS 2</b> | 14 - 16         | 5170                        | 1990  | 2.0                | 555                | 745   | 450            | 590   | 3,1                    | 3,6 | 2,7           | 2,0 | 94,2        | 94,4 |
| <b>DAS 3</b> | 14 - 14         | 3160                        | 2050  | 2.0                | 668                | 659   | 545            | 513   | 3,3                    | 2,5 | 3,1           | 3,1 | 93,6        | 94,4 |
| <b>DAS 4</b> | 16 - 16         | 580                         | 1000  | 0.6                | 292                | 316   | 245            | 269   | 2,9                    | 4,8 | 3,7           | 3,0 | 93,5        | 92,2 |
| <b>DAS 5</b> | 14 - 14         | 2060                        | 2640  | 2.0                | 548                | 516   | 434            | 432   | 1,8                    | 1,6 | 3,0           | 3,2 | 95,2        | 95,1 |
|              |                 |                             |       |                    |                    |       |                |       |                        |     |               |     |             |      |
| <b>VEM 1</b> | NA - 14         | NA                          | >3000 | 1.5*               | 225                | 193   | 175            | 151   | 1,7                    | 1,3 | 3,4           | 3,3 | 94,9        | 95,4 |
| <b>VEM 2</b> | 14 - 14         | 620                         | 360   | 0.6                | 251                | NE    | 193            | NE    | 0,5                    | NE  | 3,6           | NE  | 95,9        | NE   |
| <b>VEM 3</b> | 18 - 18         | 660                         | 960   | 0.7 – 0.9          | 129                | 193   | 98             | 163   | 2,0                    | 1,2 | 5,1           | 4,9 | 92,9        | 93,9 |
| <b>VEM 4</b> | 14 - 14         | 1360                        | 1750  | 1.3                | 177                | 294   | 148            | 231   | 2,7                    | 0,9 | 4,1           | 3,9 | 93,2        | 95,2 |
| <b>VEM 5</b> | 14 - 14         | 1620                        | 990   | 1.0                | 201                | 197   | 156            | 155   | 3,2                    | 3,2 | 1,9           | 4,5 | 94,9        | 92,3 |
| <b>VEM 6</b> | 14 - 14         | 1710                        | 1050  | 1.1                | 243                | 211   | 190            | 167   | 1,6                    | 3,6 | 2,6           | 3,0 | 95,8        | 93,4 |

| Patient ID | Needle size (G) | Protein yield / biopsy (µg) |       | Protein input (mg) | # Phospho-peptides |              | # Phosphosites   |              | Phosphosite enrichment |              |                  |              |                     |                |
|------------|-----------------|-----------------------------|-------|--------------------|--------------------|--------------|------------------|--------------|------------------------|--------------|------------------|--------------|---------------------|----------------|
|            |                 | Pre-tx                      | On-tx |                    | Pre-tx             | On-tx        | Pre-tx           | On-tx        | %S (pre - on)          |              | %T (pre - on)    |              | %Y (pre-on)         |                |
| SUN 1      | 16 - 16         | 590                         | 790   | 0.6                | 97                 | 89           | 85               | 71           | 1,2                    | 4,2          | 5,9              | 2,8          | 92,9                | 93,0           |
| SUN 2      | 14 - 14         | 2340                        | 2530  | 2.0                | 458                | 507          | 369              | 414          | 2,4                    | 4,4          | 4,1              | 4,3          | 93,5                | 90,8           |
| SUN 3      | 16 - 14         | 450                         | 2860  | 0.45<br>[2]**      | 146                | 264<br>[491] | 123              | 202<br>[403] | 3,3                    | 2,5<br>[3,0] | 2,4              | 5,0<br>[4,7] | 94,3                | 92,6<br>[92,3] |
| SUN 4      | 16 - 16         | 500                         | 530   | 0.5                | 446                | 325          | 375              | 268          | 3,2                    | 3,7          | 4,5              | 3,0          | 92,3                | 93,3           |
| SUN 5      | 14 - 14         | 4990                        | 340   | 0.35<br>[2]***     | 149<br>[378/441]   | NE           | 116<br>[306/352] | NE           | 3,5<br>[3,3/3,1]       | NE           | 1,7<br>[1,6/2,0] | NE           | 94,8<br>[95,1/94,9] | NE             |
|            |                 |                             |       |                    |                    |              |                  |              |                        |              |                  |              |                     |                |
| EVE 1      | 14 - 14         | 2697                        | 1208  | 1.2                | NE                 | NE           | NE               | NE           | NE                     | NE           | NE               | NE           | NE                  | NE             |
| EVE 2      | 18 - 18         | 441                         | NA    | 0.4                | NE                 | NE           | NE               | NE           | NE                     | NE           | NE               | NE           | NE                  | NE             |
| EVE 3      | 14 - 14         | 728                         | 1530  | 0.7                | NE                 | NE           | NE               | NE           | NE                     | NE           | NE               | NE           | NE                  | NE             |
| EVE 4      | 14 - 14         | 3389                        | 2394  | 2.3                | NE                 | 334          | NE               | 252          | NE                     | 2,4          | NE               | 2,4          | NE                  | 95,2           |
| EVE 5      | 18 - 16         | 679                         | 849   | 0.7                | 28                 | 189          | 30               | 138          | 13,3                   | 3,6          | 3,3              | 3,6          | 83,3                | 92,8           |

Protein yield, protein input, identified number (#) of phosphopeptides and phosphosites are shown per pre- and on-treatment (tx) biopsy of individual patients in each PKI cohort. Phosphosite enrichment: percentage phosphorylation on serine (S), threonine (T) and tyrosine (Y) residues of total number identified phosphosites. G, gauge; NE, not evaluable. Protein input was matched for pre- and on-treatment biopsies per individual patients, with the exception of patient VEM 3. \*, results of VEM 1 are from 2 workflow replicates of on-treatment biopsy. \*\* For SUN 3, an additional on-treatment sample of 2 mg was profiled (SUN 3 on2\_CRC in Figure 2A). \*\*\* For SUN 5, an additional pre-treatment duplo of 2 mg was profiled..

Table S3: All identified and quantified phosphopeptides

Table S4: All identified phosphosites and sample labeling

Table S5: List of highly regulated phosphopeptides in at least 3 patients per cohort

**Table S6.** PKI target profiles.

| Drug        | Targets                                                             |
|-------------|---------------------------------------------------------------------|
| Sunitinib   | VEGFR1-3, PDGFR $\alpha$ - $\beta$ , KIT, FLT-3, CSF-1R, RET        |
| Sorafenib   | VEGFR2-3, B-raf, PDGFR $\alpha$ - $\beta$ , KIT, RET                |
| Dasatinib   | BCR-ABL, SRC family (SRC, LCK, YES, FYN), KIT, EPHA2, PDGFR $\beta$ |
| Erlotinib   | EGFR                                                                |
| Vemurafenib | V600E mutated BRAF                                                  |
| Everolimus  | mTOR                                                                |

Listed targets for the 6 applied drugs in this study were derived from the PubChem <https://pubchem.ncbi.nlm.nih.gov/> and Drugbank <https://pubchem.ncbi.nlm.nih.gov/source/DrugBank> databases.

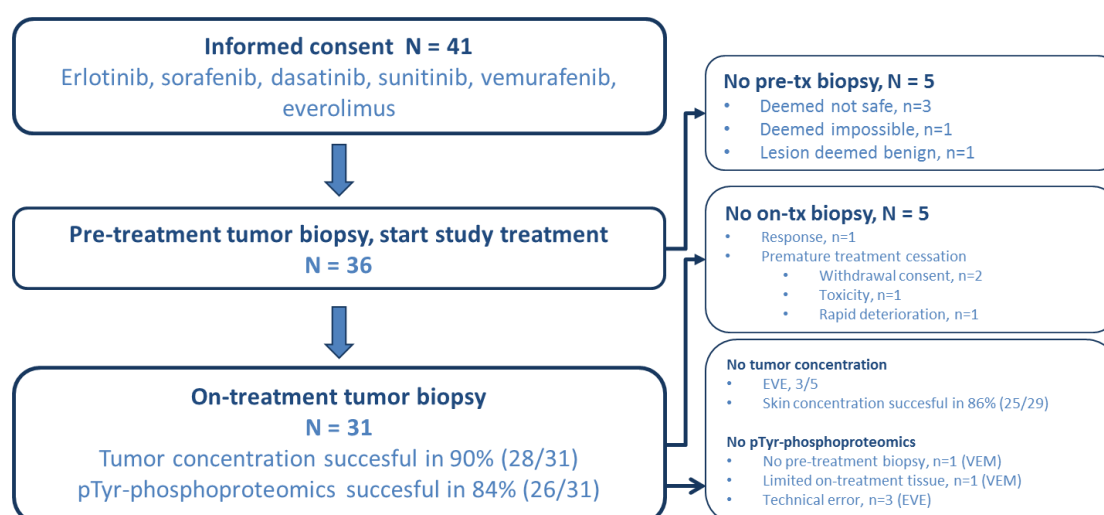

**Figure S1.** Patient disposition flowchart. Forty-one patients signed informed consent. Six cohorts were completed, i.e., with 5 evaluable patients defined as successfully performed pre- and on-treatment tumor biopsy. Five of 41 patients did not start study treatment due to the impossibility of a pre-treatment tumor biopsy based on the judgement of the interventional radiologist. Tumor re-biopsy was performed in 86% (31/36) of patients whom initiated study treatment; these patients were evaluable for the primary endpoint.

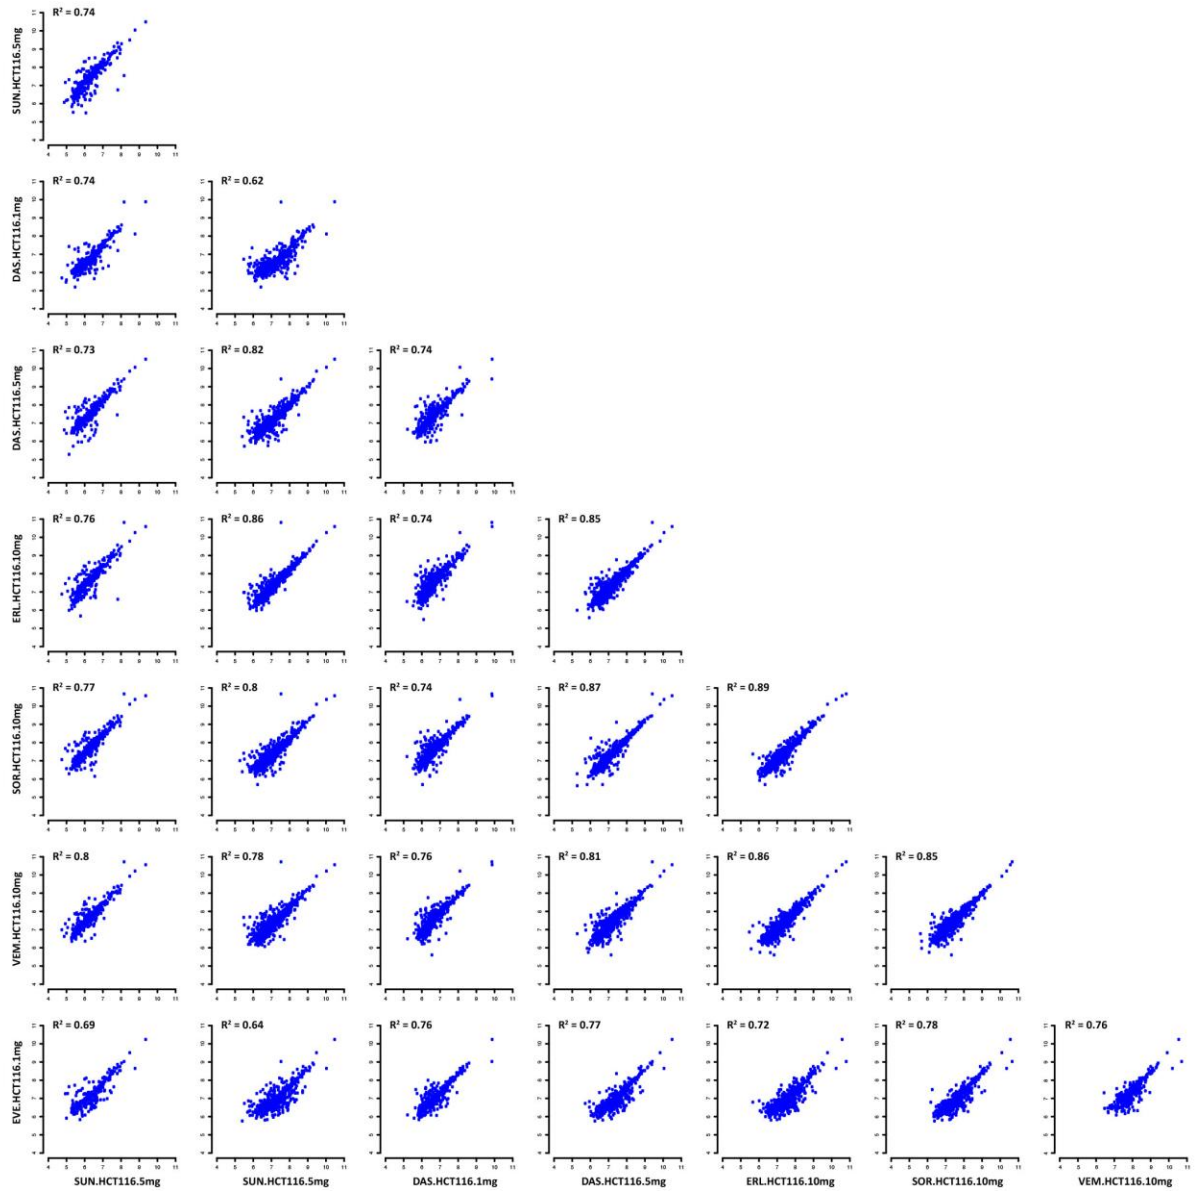

**Figure S2.** Pearson's correlations of HCT 116 control samples. Analysis of Pearson's correlations between control samples using 1, 5 or 10 mg lysate protein from colorectal cancer cell line HCT116 (measured along with the SUN, DAS, ERL, SOR, VEM and EVE drug cohorts on subsequent days) indicated that the differences in regulated peptides between the drug cohorts could not be attributed to day to day variation or batch effects.

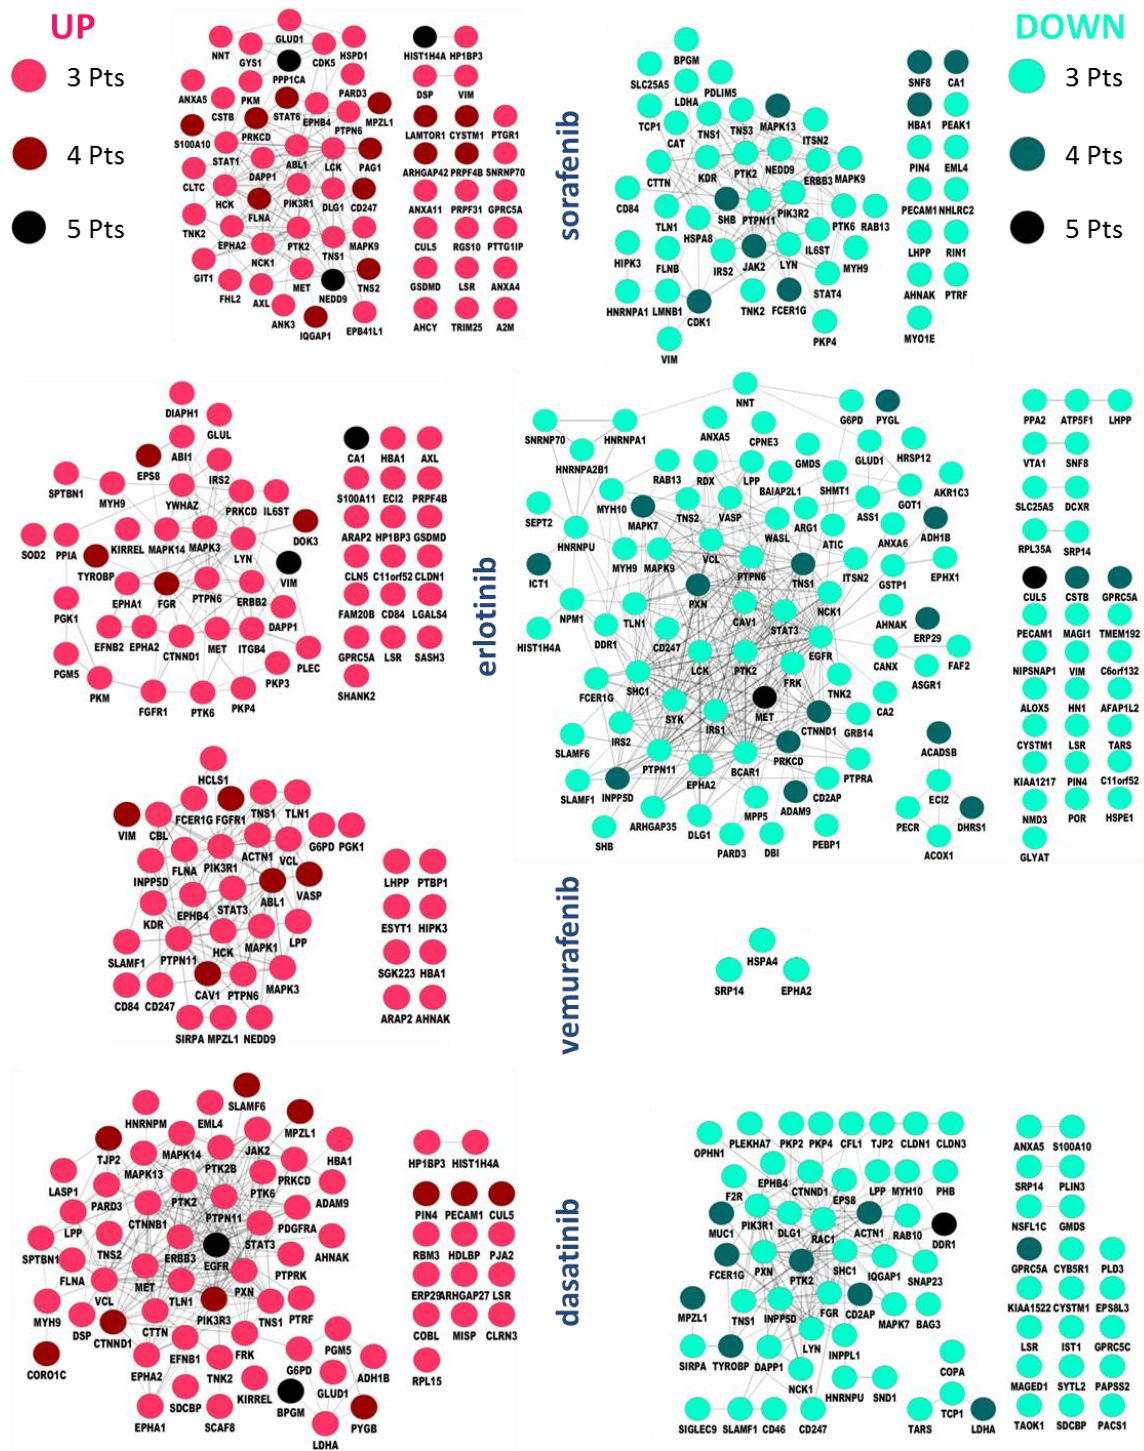

**Figure S3.** Protein interaction networks of PKI-regulated phosphopeptides. Protein interaction networks of Fc > 1.5 upregulated (red) and downregulated (green) phosphopeptides in ≥ 3 patients per cohort. Color indicates number of patients per cohort in which the regulation was observed (VEM, 4 patients; SOR/ERL/DAS, 5 patients; SUN not shown).

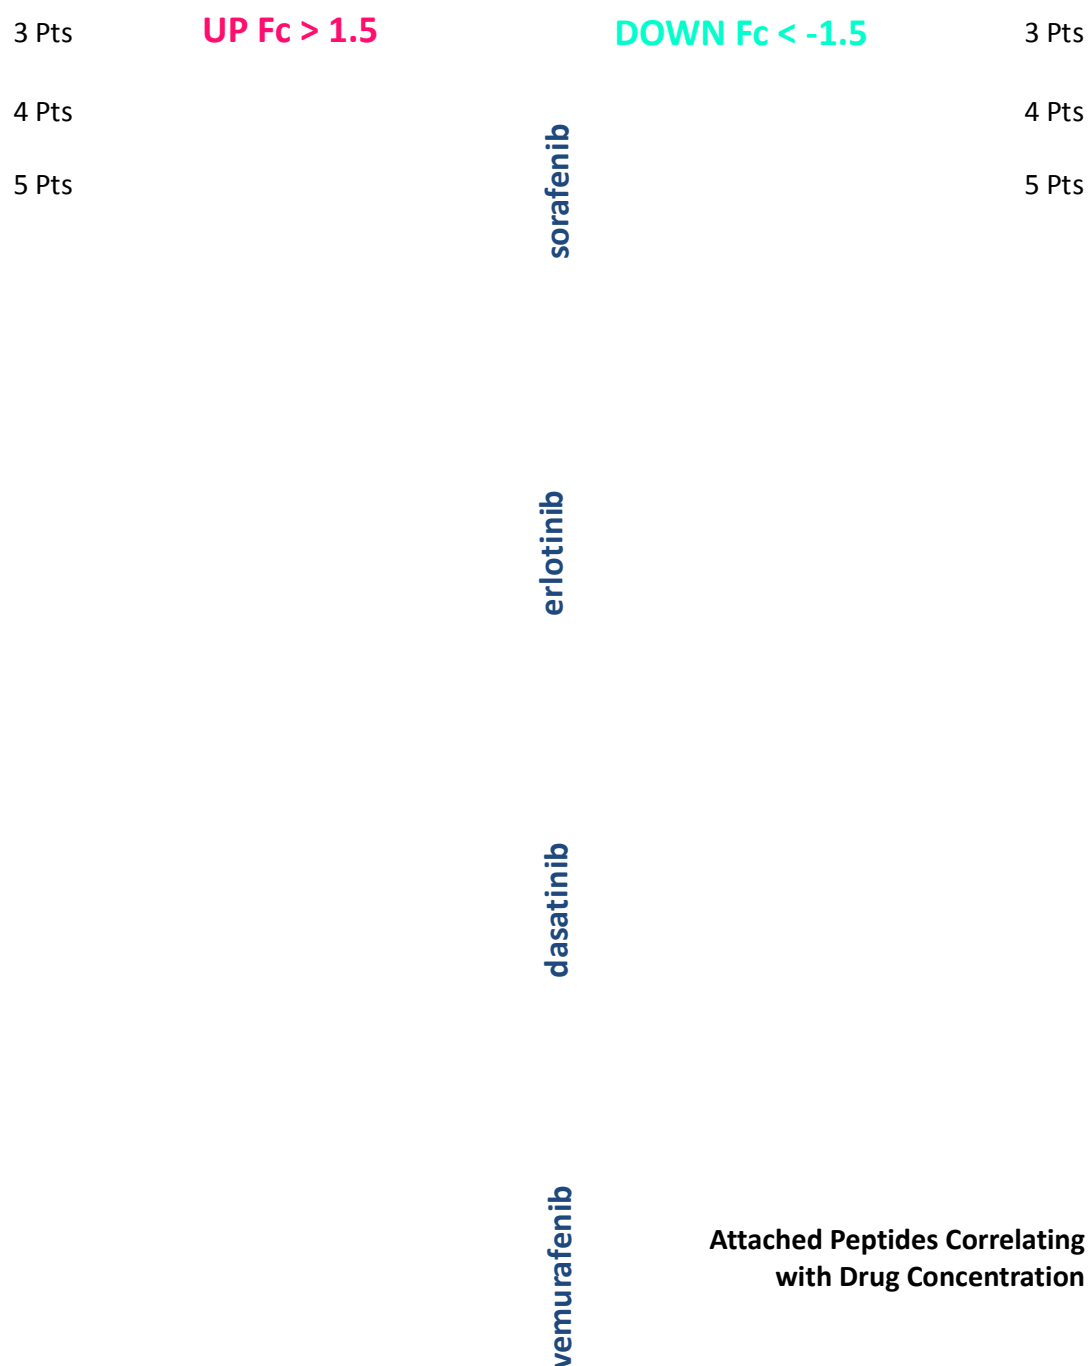

**Figure S4.** Protein interaction networks of PKI-regulated phosphopeptides related to tumor concentration. Protein interaction networks of  $F_c > 1.5$  upregulated (red) and downregulated (green) phosphopeptides in  $\geq 3$  patients per cohort. Color indicates number of patients per cohort in which the regulation was observed (*VEM*, 4 patients; *SOR/ERL/DAS*, 5 patients; *SUN* not shown).



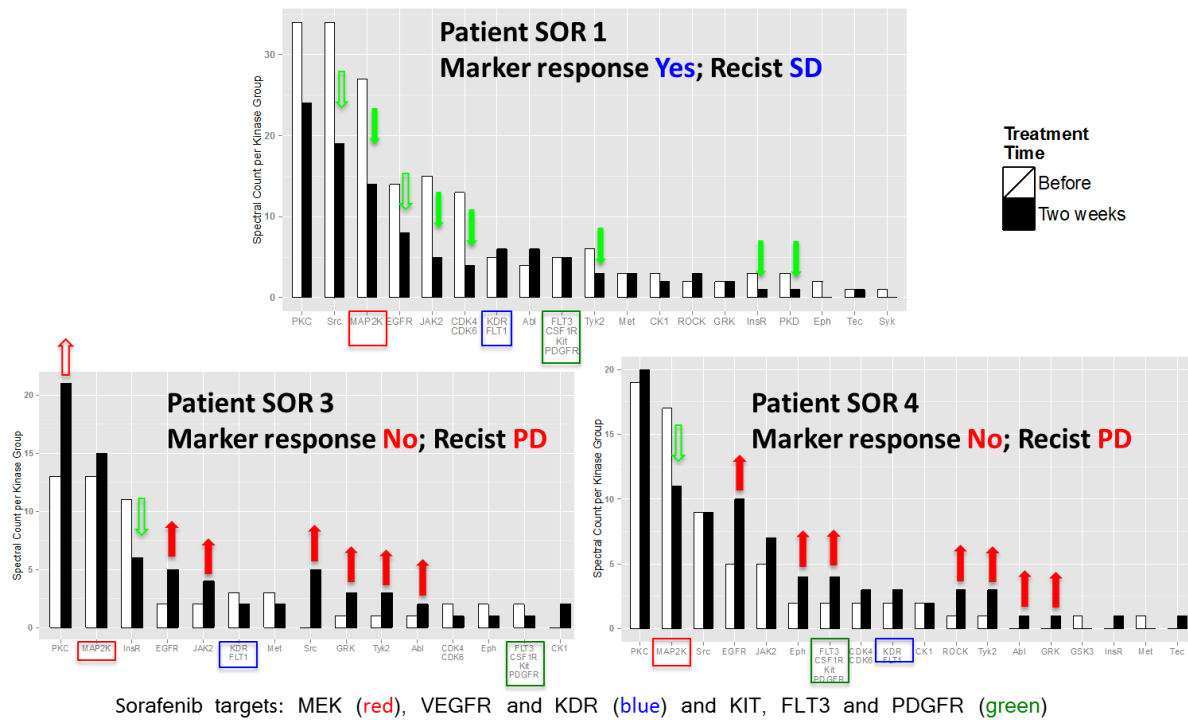

**Figure S5. Example of substrate inhibition in relation to sorafenib response.** NetworkKIN analysis of kinase activities observed in pre- (white) and on-treatment (black) tumor biopsies in 3 patients with metastatic hepatocellular carcinoma treated with sorafenib. Patient SOR 1 had a CA 19-9 marker response and prolonged stable disease upon treatment, whereas patients SOR 3 and SOR 4 exhibited primary progressive disease.
